# Supplementary material for: Comparative genome-wide association studies of a depressive symptom phenotype in a repeated measures setting by race/ethnicity in the multi-ethnic study of atherosclerosis
Source: PubMed Central journal article supplement (PMC4603946; doi:10.1186/s12863-015-0274-0), 2015-10-12
Supplement: 12863_2015_274_MOESM5_ESM.pdf [file 12863_2015_274_MOESM5_ESM.pdf]

| Ancestry        | Approach                 | CHR | SNP        | BP          | A1 | A2 | FRQ  | INFO | Beta  | SE   | Pval                  |
|-----------------|--------------------------|-----|------------|-------------|----|----|------|------|-------|------|-----------------------|
| <b>African</b>  |                          |     |            |             |    |    |      |      |       |      |                       |
|                 | <b>Baseline</b>          | 2   | rs17367970 | 14976634    | A  | G  | 0.82 | 0.97 | 0.21  | 0.04 | 1.88x10 <sup>-6</sup> |
|                 |                          | 3   | rs2639227  | 81209252    | C  | T  | 0.35 | 0.97 | -0.18 | 0.04 | 6.73x10 <sup>-7</sup> |
|                 |                          | 6   | rs9463613  | 50575789    | C  | G  | 0.95 | 0.84 | -0.40 | 0.08 | 1.70x10 <sup>-6</sup> |
|                 |                          | 7   | rs5018071  | 122362272   | A  | G  | 0.71 | 0.99 | 0.18  | 0.04 | 5.97x10 <sup>-7</sup> |
|                 | <b>Averaged</b>          | 2   | rs13394665 | * 64244935  | A  | C  | 0.73 | 0.97 | 0.15  | 0.03 | 1.27x10 <sup>-6</sup> |
|                 |                          | 2   | rs1069256  | * 173881973 | C  | T  | 0.75 | 1.02 | 0.15  | 0.03 | 1.36x10 <sup>-6</sup> |
|                 |                          | 3   | rs2639228  | 81208798    | A  | G  | 0.68 | 0.99 | 0.15  | 0.03 | 6.64x10 <sup>-7</sup> |
|                 |                          | 6   | rs7775991  | 47008467    | C  | T  | 0.73 | 1.02 | 0.14  | 0.03 | 4.78x10 <sup>-6</sup> |
|                 |                          | 6   | rs280312   | 50712854    | G  | T  | 0.95 | 1.02 | -0.29 | 0.06 | 1.90x10 <sup>-6</sup> |
|                 |                          | 7   | rs17168027 | * 134099287 | A  | G  | 0.89 | 0.89 | 0.21  | 0.05 | 4.38x10 <sup>-6</sup> |
|                 |                          | 10  | rs10825165 | 55354348    | A  | G  | 0.11 | 0.92 | -0.22 | 0.05 | 3.11x10 <sup>-6</sup> |
|                 |                          | 15  | rs9806467  | 48965568    | C  | T  | 0.83 | 1.11 | -0.16 | 0.03 | 3.81x10 <sup>-6</sup> |
|                 | <b>Repeated Measures</b> | 1   | rs1188356  | 30983669    | G  | T  | 0.79 | 1.02 | 0.16  | 0.03 | 7.33x10 <sup>-7</sup> |
|                 |                          | 1   | rs1413227  | 97477486    | C  | T  | 0.92 | 1.02 | -0.22 | 0.05 | 3.19x10 <sup>-6</sup> |
|                 |                          | 2   | rs13394665 | * 64244935  | A  | C  | 0.73 | 0.97 | 0.15  | 0.03 | 6.70x10 <sup>-7</sup> |
|                 |                          | 2   | rs1069256  | * 173881973 | C  | T  | 0.75 | 1.02 | 0.17  | 0.03 | 6.00x10 <sup>-7</sup> |
|                 |                          | 3   | rs9874245  | 81211967    | A  | G  | 0.85 | 1.03 | 0.20  | 0.04 | 1.63x10 <sup>-7</sup> |
|                 |                          | 4   | rs1380155  | 128947268   | A  | G  | 0.95 | 1.91 | 0.45  | 0.10 | 4.22x10 <sup>-6</sup> |
|                 |                          | 7   | rs17168027 | * 134099287 | A  | G  | 0.89 | 0.89 | 0.22  | 0.05 | 1.98x10 <sup>-6</sup> |
|                 |                          | 10  | rs11003972 | 55421987    | C  | G  | 0.85 | 0.98 | 0.19  | 0.04 | 2.09x10 <sup>-6</sup> |
|                 |                          | 15  | rs1026672  | 64280411    | C  | T  | 0.81 | 0.98 | 0.16  | 0.03 | 4.10x10 <sup>-6</sup> |
|                 |                          | 15  | rs8029458  | 89405378    | G  | T  | 0.80 | 0.93 | -0.16 | 0.04 | 3.67x10 <sup>-6</sup> |
|                 |                          | 15  | rs11630508 | 99138869    | A  | G  | 0.15 | 0.87 | 0.20  | 0.04 | 1.39x10 <sup>-6</sup> |
| <b>European</b> |                          |     |            |             |    |    |      |      |       |      |                       |
|                 | <b>Baseline</b>          | 1   | rs1543251  | 105839118   | G  | T  | 0.86 | 1.02 | 0.20  | 0.04 | 1.33x10 <sup>-7</sup> |
|                 |                          | 2   | rs2602569  | 168998331   | C  | T  | 0.08 | 0.98 | 0.22  | 0.05 | 4.11x10 <sup>-6</sup> |
|                 |                          | 4   | rs4399935  | 156175906   | A  | C  | 0.65 | 0.97 | 0.13  | 0.03 | 4.71x10 <sup>-6</sup> |
|                 |                          | 7   | rs7457833  | * 33521559  | A  | G  | 0.90 | 1.01 | -0.20 | 0.04 | 3.26x10 <sup>-6</sup> |
|                 |                          | 8   | rs1460396  | 2913482     | A  | G  | 0.19 | 0.89 | 0.16  | 0.03 | 4.90x10 <sup>-6</sup> |
|                 |                          | 10  | rs6583751  | 92828756    | C  | G  | 0.61 | 0.96 | 0.13  | 0.03 | 2.48x10 <sup>-6</sup> |
|                 |                          | 13  | rs1838113  | 18394504    | C  | T  | 0.07 | 0.81 | -0.26 | 0.06 | 4.11x10 <sup>-6</sup> |
|                 |                          | 13  | rs4884095  | 77898753    | A  | T  | 0.78 | 0.98 | -0.15 | 0.03 | 9.09x10 <sup>-7</sup> |
|                 | <b>Averaged</b>          | 1   | rs12564617 | 105832151   | A  | G  | 0.14 | 1.01 | -0.15 | 0.03 | 1.71x10 <sup>-6</sup> |

|                          |    |               |   |           |   |   |      |      |       |      |                       |
|--------------------------|----|---------------|---|-----------|---|---|------|------|-------|------|-----------------------|
|                          | 3  | rs17694541    | * | 135885739 | C | T | 0.08 | 1.06 | -0.18 | 0.04 | 4.91x10 <sup>-6</sup> |
|                          | 7  | rs7457833     | * | 33521559  | A | G | 0.90 | 1.01 | -0.18 | 0.04 | 2.12x10 <sup>-6</sup> |
|                          | 9  | rs10739282    | * | 111488202 | A | C | 0.41 | 0.99 | 0.11  | 0.02 | 8.26x10 <sup>-7</sup> |
|                          | 10 | rs12146350    |   | 22883117  | C | G | 0.40 | 0.97 | -0.11 | 0.02 | 3.48x10 <sup>-6</sup> |
| <b>Repeated Measures</b> | 1  | rs897632      |   | 2816023   | A | G | 0.23 | 1.00 | -0.13 | 0.03 | 2.51x10 <sup>-6</sup> |
|                          | 1  | rs12563710    |   | 105831868 | A | C | 0.86 | 1.01 | 0.16  | 0.03 | 1.30x10 <sup>-6</sup> |
|                          | 3  | rs17694541    | * | 135885739 | C | T | 0.08 | 1.06 | -0.19 | 0.04 | 3.51x10 <sup>-6</sup> |
|                          | 7  | rs4720629     |   | 5441935   | C | T | 0.91 | 1.01 | 0.19  | 0.04 | 2.12x10 <sup>-6</sup> |
|                          | 7  | rs7457833     | * | 33521559  | A | G | 0.90 | 1.01 | -0.19 | 0.04 | 7.93x10 <sup>-7</sup> |
|                          | 9  | rs10739282    | * | 111488202 | A | C | 0.41 | 0.99 | 0.11  | 0.02 | 8.40x10 <sup>-7</sup> |
|                          | 10 | rs7916922     |   | 22859264  | C | T | 0.37 | 0.92 | -0.11 | 0.02 | 3.93x10 <sup>-6</sup> |
|                          | 10 | rs11013046    |   | 22880589  | C | T | 0.41 | 1.00 | -0.11 | 0.02 | 6.04x10 <sup>-7</sup> |
|                          | 10 | rs12267148    |   | 92850261  | A | G | 0.67 | 0.93 | 0.12  | 0.03 | 1.52x10 <sup>-6</sup> |
| <b>Chinese</b>           |    |               |   |           |   |   |      |      |       |      |                       |
| <b>Baseline</b>          | 10 | rs12769343    |   | 29247812  | A | G | 0.33 | 0.92 | -0.24 | 0.05 | 2.48x10 <sup>-6</sup> |
| <b>Averaged</b>          | 11 | rs2461672     | * | 80525681  | C | T | 0.79 | 0.90 | 0.25  | 0.05 | 1.42x10 <sup>-6</sup> |
|                          | 10 | rs4529793     | * | 65960699  | A | G | 0.09 | 1.02 | 0.33  | 0.07 | 4.28x10 <sup>-6</sup> |
| <b>Repeated Measures</b> | 2  | rs12990176    |   | 150385322 | G | T | 0.06 | 0.96 | -0.32 | 0.07 | 3.53x10 <sup>-6</sup> |
|                          | 10 | rs4529793     | * | 65960699  | A | G | 0.09 | 1.02 | 0.34  | 0.07 | 2.71x10 <sup>-7</sup> |
|                          | 11 | rs2461672     | * | 80525681  | C | T | 0.79 | 0.90 | 0.24  | 0.05 | 3.89x10 <sup>-6</sup> |
|                          | 12 | rs17115484    |   | 74370892  | C | T | 0.10 | 0.97 | -0.29 | 0.06 | 7.05x10 <sup>-7</sup> |
| <b>Hispanic</b>          |    |               |   |           |   |   |      |      |       |      |                       |
| <b>Baseline</b>          | 2  | rs17023193    |   | 83192390  | A | T | 0.12 | 1.03 | -0.28 | 0.06 | 3.94x10 <sup>-7</sup> |
|                          | 3  | rs1127233     | * | 126109714 | G | T | 0.23 | 1.00 | 0.24  | 0.04 | 3.85x10 <sup>-8</sup> |
|                          | 4  | rs2903246     |   | 11750932  | A | T | 0.38 | 1.03 | -0.18 | 0.04 | 3.21x10 <sup>-6</sup> |
|                          | 4  | rs4695747     | * | 175015856 | A | G | 0.93 | 0.99 | 0.39  | 0.07 | 1.25x10 <sup>-7</sup> |
|                          | 5  | rs806600      |   | 172847545 | A | G | 0.49 | 0.99 | -0.17 | 0.04 | 2.93x10 <sup>-6</sup> |
|                          | 7  | rs909092      |   | 141759938 | A | G | 0.90 | 0.98 | 0.31  | 0.06 | 7.03x10 <sup>-7</sup> |
| <b>Averaged</b>          | 4  | rs4695747     | * | 175015856 | A | G | 0.93 | 0.99 | 0.28  | 0.06 | 4.78x10 <sup>-6</sup> |
|                          | 5  | rs7728557     | * | 74329715  | A | G | 0.32 | 1.03 | 0.15  | 0.03 | 1.61x10 <sup>-6</sup> |
|                          | 14 | rs8016794     |   | 52070396  | A | G | 0.83 | 1.06 | 0.18  | 0.04 | 4.49x10 <sup>-6</sup> |
| <b>Repeated Measures</b> | 2  | SNP_A-1966287 |   | 191577187 | C | T | 0.11 | 1.03 | 0.24  | 0.05 | 1.71x10 <sup>-6</sup> |
|                          | 3  | rs1127233     | * | 126109714 | G | T | 0.23 | 1.00 | 0.18  | 0.04 | 2.06x10 <sup>-6</sup> |
|                          | 4  | rs4695747     | * | 175015856 | A | G | 0.93 | 0.99 | 0.31  | 0.06 | 9.25x10 <sup>-7</sup> |
|                          | 5  | rs7728557     | * | 74329715  | A | G | 0.32 | 1.03 | 0.16  | 0.03 | 1.96x10 <sup>-6</sup> |

|    |            |           |   |   |      |      |       |      |                       |
|----|------------|-----------|---|---|------|------|-------|------|-----------------------|
| 5  | rs244897   | 167851370 | C | T | 0.11 | 0.92 | 0.24  | 0.05 | 4.23x10 <sup>-6</sup> |
| 6  | rs3805944  | 43153440  | G | T | 0.91 | 1.03 | -0.24 | 0.05 | 3.11x10 <sup>-6</sup> |
| 7  | rs123778   | 157062905 | C | G | 0.85 | 1.31 | -0.24 | 0.05 | 2.43x10 <sup>-6</sup> |
| 14 | rs7148635  | 66979360  | A | G | 0.59 | 1.02 | -0.15 | 0.03 | 4.25x10 <sup>-6</sup> |
| 14 | rs17106996 | 77702071  | A | G | 0.92 | 0.95 | -0.27 | 0.06 | 1.03x10 <sup>-6</sup> |
| 16 | rs9652625  | 51663724  | C | G | 0.68 | 0.89 | -0.17 | 0.04 | 2.73x10 <sup>-6</sup> |

\*indicates SNP that reached genome-wide suggestive p-value in multiple approaches

MAF>5%, INFO > 0.80, LD R<sup>2</sup> > 0.80

CHR: chromosome, SNP: single nucleotide polymorphism, BP: base pair, A1/A2: coded and non-coded allele, FRQ: coded allele frequency, INFO: imputation information score, SE: standard error, MAF: minor allele frequency, LD: linkage disequilibrium
